## RESEARCH ARTICLE

## Clinical performance validation of the STANDARD G6PD test: A multi-country pooled analysis

Wondimagegn Adissu<sup>1,2</sup>, Marcelo Brito<sup>3,4</sup>, Eduardo Garbin<sup>5</sup>, Marcela Macedo<sup>5</sup>, Wuelton Monteiro<sup>3,4</sup>, Sandip Kumar Mukherjee<sup>6</sup>, Jane Myburg<sup>7</sup>, Mohammad Shafiul Alam<sup>8</sup>, Germana Bancone<sup>9,10</sup>, Pooja Bansil<sup>11</sup>, Sampa Pal<sup>11</sup>, Abhijit Sharma<sup>11</sup>, Stephanie Zobrist<sup>11</sup>, Andrew Bryan<sup>12</sup>, Cindy S. Chu<sup>9,10</sup>, Santasabuj Das<sup>6</sup>, Gonzalo J. Domingo<sup>11</sup>, Amanda Hann<sup>7</sup>, James Kublin<sup>12,13</sup>, Marcus V. G. Lacerda<sup>3,4,14</sup>, Mark Layton<sup>7</sup>, Benedikt Ley<sup>15</sup>, Sean C. Murphy<sup>16,17</sup>, Francois Nosten<sup>9,10</sup>, Dhélio Pereira<sup>5,18</sup>, Ric N. Price<sup>10,15</sup>, Arunansu Talukdar<sup>19</sup>, Daniel Yilma<sup>2,20</sup>, Emily Gerth-Guyette<sup>11\*</sup>

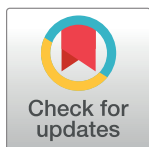

## OPEN ACCESS

**Citation:** Adissu W, Brito M, Garbin E, Macedo M, Monteiro W, Mukherjee SK, et al. (2023) Clinical performance validation of the STANDARD G6PD test: A multi-country pooled analysis. PLoS Negl Trop Dis 17(10): e0011652. <https://doi.org/10.1371/journal.pntd.0011652>

**Editor:** David Joseph Diemert, George Washington University School of Medicine and Health Sciences, UNITED STATES

**Received:** January 12, 2023

**Accepted:** September 8, 2023

**Published:** October 12, 2023

**Copyright:** © 2023 Adissu et al. This is an open access article distributed under the terms of the [Creative Commons Attribution License](https://creativecommons.org/licenses/by/4.0/), which permits unrestricted use, distribution, and reproduction in any medium, provided the original author and source are credited.

**Data Availability Statement:** The data underlying the results presented in this manuscript can be accessed through the cited publications and at: <https://dataverse.harvard.edu/dataset.xhtml?persistentId=doi:10.7910/DVN/KLUZTX> (doi: 10.7910/DVN/KLUZTX). <https://dataverse.harvard.edu/dataset.xhtml?persistentId=doi:10.7910/DVN/XJTFXX>. The data underlying the results presented in this manuscript can be accessed through the cited publications and at: <https://dataverse.harvard.edu/dataset.xhtml?persistentId=doi:10.7910/DVN/>

**1** School of Medical Laboratory Sciences, Jimma University, Jimma, Ethiopia, **2** Clinical Trial Unit, Jimma University, Jimma, Ethiopia, **3** Fundação de Medicina Tropical Dr Heitor Vieira Dourado (FMT-HVD), Manaus, Amazonas, Brazil, **4** Universidade do Estado do Amazonas, Manaus, Amazonas, Brazil, **5** Centro de Pesquisa Em Medicina Tropical (CEPEM), Porto Velho, Rondônia, Brazil, **6** National Institute of Cholera and Enteric Diseases, Kolkata, India, **7** Special Haematology Laboratory, Hammersmith Hospital, London, United Kingdom, **8** Infectious Diseases Division, International Centre for Diarrheal Diseases Research, Bangladesh (icddr,b), Mohakhali, Dhaka, Bangladesh, **9** Shoklo Malaria Research Unit, Mahidol-Oxford Tropical Medicine Research Unit, Faculty of Tropical Medicine, Mahidol University, Thailand, **10** Centre for Tropical Medicine and Global Health, Nuffield Department of Medicine, University of Oxford, Oxford, United Kingdom, **11** Diagnostics, PATH, Seattle, Washington, United States of America, **12** Departments of Laboratory Medicine and Microbiology, University of Washington School of Medicine, Seattle, Washington, United States of America, **13** Vaccine and Infectious Disease Division, Fred Hutchinson Cancer Research Center, Seattle, Washington, United States of America, **14** Instituto Leônidas & Maria Deane (ILMD), Fiocruz, Manaus, Amazonas, Brazil, **15** Global and Tropical Health Division, Menzies School of Health Research and Charles Darwin University, Darwin, Australia, **16** Department of Laboratory Medicine and Pathology, University of Washington, Seattle, Washington, United States of America, **17** Center for Emerging and Reemerging Infectious Diseases, University of Washington, Seattle, Washington, United States of America, **18** Universidade Federal de Rondônia (UNIR), Porto Velho, Rondônia, Brazil, **19** Kolkata Medical College Hospital, India, **20** Department of Internal Medicine, Jimma University, Jimma, Ethiopia

\* [egerthguyette@path.org](mailto:egerthguyette@path.org)

## Abstract

## Introduction

Screening for G6PD deficiency can inform disease management including malaria. Treatment with the antimalarial drugs primaquine and tafenoquine can be guided by point-of-care testing for G6PD deficiency.

## Methods and findings

Data from similar clinical studies evaluating the performance of the STANDARD G6PD Test (SD Biosensor, South Korea) conducted in Bangladesh, Brazil, Ethiopia, India, Thailand, the United Kingdom, and the United States were pooled. Test performance was assessed in a retrospective analysis on capillary and venous specimens. All study sites used spectrophotometry for reference G6PD testing, and either the HemoCue or complete blood count

KLUTX (doi: 10.7910/DVN/KLUTX). <https://dataverse.harvard.edu/dataset.xhtml?persistentId=doi:10.7910/DVN/XJTFXX> <https://dataverse.harvard.edu/dataset.xhtml?persistentId=doi:10.7910/DVN/5EQ9CD> <https://dataverse.harvard.edu/dataset.xhtml?persistentId=doi:10.7910/DVN/GLLPV9> <https://dataverse.harvard.edu/dataset.xhtml?persistentId=doi:10.7910/DVN/AAZFJ9> <https://www.ncbi.nlm.nih.gov/pmc/articles/PMC6214512/> (S1 Data).

**Funding:** The Brazil, Ethiopia, India, Thailand, UK, and US studies were funded by the United Kingdom's Foreign, Commonwealth & Development Office (FCDO), grant number 204139 and, by the Bill & Melinda Gates Foundation [OPP1107113]. The FCDO and Bill & Melinda Gates Foundation awards to PATH support the availability of point-of-care tests for G6PD deficiency. GB, CSC, and FN work at the Shoklo Malaria Research Unit, part of the Mahidol Oxford University Research Unit supported by the Wellcome Trust Mahidol Major Overseas Programme–Thailand Unit (Grant Number 220211). For the purpose of Open Access, the authors have applied a CC BY public copyright license to any author accepted manuscript version arising from this submission RNP and the Bangladesh study were funded by the Wellcome Trust (Senior Fellowship in Clinical Science, 200909), BL is funded by the Australian Department of Foreign Affairs and Trade, RNP is funded by the Bill & Melinda Gates Foundation (OPP1054404 and OPP1164105). MVGL and WMM are funded by Brazilian CNPq. Under the grant conditions of the Gates Foundation, a Creative Commons Attribution 4.0 Generic License has been assigned to the Author Accepted Manuscript version that might arise from this submission. The findings and conclusions contained within are those of the authors and do not necessarily reflect the positions of FCDO or the Gates Foundation. The funders had no role in study design, data collection and analysis, decision to publish, or preparation of the manuscript.

**Competing interests:** The authors have declared that no competing interests exist.

for reference hemoglobin measurement. The sensitivity of the STANDARD G6PD Test using the manufacturer thresholds for G6PD deficient and intermediate cases in capillary specimens from 4212 study participants was 100% (95% Confidence Interval (CI): 97.5%–100%) for G6PD deficient cases with <30% activity and 77% (95% CI 66.8%–85.4%) for females with intermediate activity between 30%–70%. Specificity was 98.1% (95% CI 97.6%–98.5%) and 92.8% (95% CI 91.6%–93.9%) for G6PD deficient individuals and intermediate females, respectively. Out of 20 G6PD intermediate females with false normal results, 12 had activity levels >60% on the reference assay. The negative predictive value for females with G6PD activity >60% was 99.6% (95% CI 99.1%–99.8%) on capillary specimens. Sensitivity among 396 *P. vivax* malaria cases was 100% (69.2%–100.0%) for both deficient and intermediate cases. Across the full dataset, 37% of those classified as G6PD deficient or intermediate resulted from true normal cases. Despite this, over 95% of cases would receive correct treatment with primaquine, over 87% of cases would receive correct treatment with tafenoquine, and no true G6PD deficient cases would be treated inappropriately based on the result of the STANDARD G6PD Test.

## Conclusions

The STANDARD G6PD Test enables safe access to drugs which are contraindicated for individuals with G6PD deficiency. Operational considerations will inform test uptake in specific settings.

## Author summary

The glucose-6-phosphate dehydrogenase (G6PD) enzyme helps red blood cells work properly. When the body does not have enough of this enzyme and is exposed to oxidative challenges, including certain foods and medicines, red blood cells break down faster than they are made, causing hemolytic anemia. Diagnostics tools for this common condition have been limited but now, new point of care tests are available that can screen more people who are unable to access laboratory services. This is particularly important for the treatment of vivax malaria, where the only treatment options require G6PD screening before administration. This research provides an evaluation of the diagnostic performance of one such tool, the STANDARD G6PD Test (SD Biosensor, South Korea), based on extensive data from multiple studies. These data show that the test can be used to safely identify people with G6PD deficiency, which will help ensure they do not receive contraindicated medicines. The research also provides specific estimates about how this test may impact malaria case management and treatment options.

## Introduction

The glucose-6-phosphate dehydrogenase (G6PD) enzyme plays an essential role in the protection of red blood cells against damage from oxidative stress. This enzyme is one of the most polymorphic in the human genome, leading to many mutations resulting in the enzymopathy G6PD deficiency [1]. G6PD deficiency is one of the most common human genetic disorders affecting an estimated 500 million people worldwide [1]. The red blood cells of individuals with this condition have decreased G6PD enzyme activity and are more susceptible to

hemolysis as a result of an oxidative challenge. Common oxidative challenges include from foods such as fava beans, [2] infections such as SARS-CoV-2 infection [3,4] and typhoid, and medications such as rasburicase [5] and 8-aminoquinoline-based anti-malaria drugs used for radical cure treatment of *Plasmodium vivax* malaria (e.g., primaquine and tafenoquine) [6,7]. G6PD deficiency is also a strong predictor of pathologic neonatal jaundice and potential for life-threatening kernicterus in newborns [8–10].

Until recently, diagnosis of G6PD deficiency has primarily relied on moderate to high complexity laboratory assays. In practice, the implementation of such tests has been challenging as described in a recent publication from the College of American Pathologists as well as meta-analysis spectrophotometry-based quantification of G6PD activity [11,12]. More recently, point-of-care (POC) tests for G6PD deficiency are emerging, providing opportunities to expand testing to populations without access to laboratory-based assays [13]. Such tests are particularly important in the context of malaria case management, given the limited infrastructure in settings where malaria patients typically seek care. At a global level, the World Health Organization recommends G6PD testing prior to the administration of radical cure treatments for *P. vivax* malaria [14]. However, among malaria-endemic countries, policies and practices related to G6PD testing and radical cure implementation vary significantly, based in part on the underlying epidemiology of G6PD deficiency as well as barriers to access and adoption [15].

POC tests for G6PD deficiency include both qualitative rapid tests, as well as quantitative biosensor tests that provide numeric results of patients' G6PD activity levels. Two qualitative tests have shown promise under laboratory conditions, but have limitations in field conditions, including challenges with temperature correction and the inability to identify females with intermediate G6PD activity arising from a heterozygous *g6pd<sub>normal</sub>/g6pd<sub>deficient</sub>* genotype [16–18]. The STANDARD G6PD Test (SD Biosensor, Republic of Korea) is a quantitative enzymatic colorimetric assay intended to aid in the detection of G6PD deficiency at the POC. The test measures G6PD enzyme activity normalized by hemoglobin (Hb) in units per gram Hb (U/g Hb) and total-hemoglobin concentration (g/dL) on 10 µl of capillary or venous blood samples. Results are provided within two minutes on a portable, handheld analyzer and used to classify individuals as G6PD normal, intermediate, or deficient according to the manufacturer's recommended thresholds. This classification can be used to inform clinical decision-making, particularly as it relates to priority applications, such as malaria case management.

Cross-sectional diagnostic accuracy studies have been conducted in a wide range of settings and locations, to evaluate the performance of the STANDARD G6PD Test [19–24]. Pooling data from these studies allows for a robust diagnostic performance analysis across diverse populations representative of multiple contexts and use cases for POC G6PD testing. Our aims were to 1) present these data for the STANDARD G6PD Test, 2) explore how a common set of thresholds to classify G6PD deficient or intermediate individuals with POC testing can be applied across populations, and 3) consider the implications of the test performance on 8-aminoquinoline malaria treatment regimens.

## Materials and methods

### Ethics statement

All studies involving human subjects were reviewed by relevant ethics committees and written informed consent to participate was obtained for all participants. The following ethics committees approved this research under the associated approval numbers:

- Australian Human Research Ethics Committee (HREC) of the Northern Territory (HREC 17.2771)

- Brazil's National Research Ethics Commission (CONEP; 94833618.0.1001.0005)
- Centro de Pesquisa em Medicina Tropical Ethics Committee (94833618.0.2001.0011)
- Ethiopian National Research Ethics Review Committee (NRERC)
- Icddr,b ethical review committee (ERC) and research review committee (RRC) (PR-17043)
- Indian Council for Medical Research (ICMR)- National Institute of Cholera and Enteric Disease Institutional Ethics Committee (IEC)
- Fundação de Medicina Tropical Doutor Heitor Vieira Dourado FMT/HVD Ethics Committee Board (94833618.0.1001.0005)
- Mahidol University Faculty of Tropical Medicine (FTMEC MO/15/259)
- Medical College of Kolkata Institutional Ethics Committee (IEC)
- PATH Research Ethics Committee (1204742), (1185779), (1223628), (1416844)
- University of Oxford Tropical Research Ethics Committee (OXTREC 563–15)
- Washington: Fred Hutchinson Cancer Research Center institutional review board [IRB] (10091)
- Western Institutional Review Board (20161665)

## Study populations

Varying recruitment methods appropriate to each site were employed to ensure study populations that were both representative of intended use settings—including malaria-endemic settings and blood donation centers—as well as of G6PD activity levels across the dynamic range ([S1 Table](#)).

Data were included from similar cross-sectional diagnostic accuracy studies conducted in seven countries: Bangladesh, [[21](#)] Brazil, [[20](#)] Ethiopia [[23](#)], India [[24](#)], Thailand, [[19](#)] the United Kingdom, [[22](#)] and the United States [[19,22](#)] ([S1 Table](#)). Although the studies contributing to this analysis were not prospectively designed as a multi-center clinical study, all but one study [[21](#)] was prospectively planned and designed to enable pooling of individual-level data in support of regulatory submissions for this product. Collectively, these studies span a varied range of underlying G6PD epidemiology and malaria incidence. The primary objective of all studies was to evaluate the performance of the STANDARD G6PD Test for its ability to identify G6PD normal, intermediate, and deficient individuals, and to evaluate the test's ability to measure hemoglobin concentration. The performance of the STANDARD G6PD Test on capillary and/or venous specimens was compared to G6PD reference values normalized by hemoglobin from venous specimens tested with a spectrophotometer. Only one study (Thailand) used frozen venous specimens [[19](#)]. The performance of the STANDARD G6PD Test in the measurement of hemoglobin concentration was also compared to a complete blood count from automated hematology analyzers where available, and/or to results from venous specimens on the HemoCue 201+ system.

## Testing

[S1 Fig](#) summarizes the tests and overall workflow of the included studies, and venous specimen storage and transport details are described in [S1 Table](#).

**STANDARD G6PD Test.** The STANDARD G6PD Test was performed in all studies on non-anticoagulated capillary and/or venous K<sub>2</sub>EDTA whole blood as per the manufacturer's instructions. In addition to the analyzer, test components include disposable test strips (Test Devices), disposable blood transfer tubes (Ezi Tubes+), extraction buffer vials, and a lot-specific code chip used for calibration. For testing on capillary specimens, 10 µl of blood was collected via fingerprick using a disposable Ezi Tube+ and mixed with the extraction buffer. Next, a second, clean Ezi Tube+ was used to transfer 10 µl of the mixed specimen to the Test Device, which is inserted into the analyzer. When run on venous specimens, 10 µl of blood was transferred to the buffer solution using either a professional pipette [20–24] or the Ezi Tube+ sample collector [19,22]. After two minutes, the test reports quantitative measurements of G6PD activity in U/g Hb and hemoglobin (g/dL). The manufacturer's recommended G6PD activity thresholds were applied to determine G6PD status based on the quantitative test result. 4.0 U/g Hb and below was used to classify deficient individuals and 4.1–6.0 U/g Hb for intermediate females. These thresholds,  $\leq 4.0$  U/g Hb and  $\leq 6.0$  U/g Hb, correspond with  $\leq 30\%$  activity and  $\leq 70\%$  activity, respectively.

**Reference G6PD testing.** In all studies, spectrophotometry was used as the reference assay on venous K<sub>2</sub>EDTA whole blood, using a temperature-regulated instrument. Either the Pointe Scientific (Canton, MI, catalog number G7583) or the Trinity Biotech (Bray, Ireland) G6PD reagent kits were used. All G6PD activity results were normalized for hemoglobin concentration and are presented in U/g Hb.

**Hemoglobin measurement.** Hemoglobin was measured according to the following methods:

- *Complete blood count (CBC).* In the Bangladesh, Brazil, Ethiopia, India, Thailand, and US (2021) studies in Pennsylvania and Washington, [19–24] total hemoglobin concentration (g/dL) was determined using a CBC on an automated hematology analyzer. This measurement served as the reference method for the measurement of Hb concentration and was used to normalize the reference assay for G6PD activity.
- *HemoCue 201+.* With the exception of the Bangladesh and Thailand studies, the HemoCue Hb 201+ System was also performed on non-anticoagulated capillary blood and/or venous K<sub>2</sub>EDTA blood as a comparative measure of hemoglobin concentration in g/dL according to the manufacturer instructions. For studies where CBC was not available, the HemoCue 201+ measurement was used to normalize the reference assay for G6PD activity.

**Malaria testing.** In three studies, the malaria status of participants was assessed by the standard method at each site—either microscopy (Brazil) or rapid diagnostic test (Ethiopia and India).

## Contrived specimen study

Lastly, data are also presented for a contrived specimen study [22] that included a panel of 90 specimens spanning critical G6PD activity thresholds developed using heat abrogation and following a method adapted from the UK National External Quality Assurance Services G6PD scheme [25]. Five contrived specimens representing a broad hemoglobin concentration range were also developed using plasma-level adjustment. These 95 samples underwent blinded testing with the STANDARD G6PD Test and reference assay.

## Statistical methods

Due to the observed inter-laboratory variability of the G6PD reference assay, [11,22] absolute G6PD values were normalized for each laboratory conducting the reference assay in each

study [26–28]. Reference G6PD activity values were expressed as the percentage of each site's adjusted male median (AMM). For the majority of studies, the AMM was calculated from a subset of randomly selected males ( $n = 36$ ) with normal G6PD status as determined by each laboratory's reference range. These 36 males were subsequently excluded from the analytical population for the performance analysis. In the UK study, 39 males were used to calculate the AMM. In the Bangladesh study, the AMM was calculated from the median activity of all known G6PD normal participants. For the Thai study, the AMM was calculated as described in Domingo et al. (2013), [29] wherein all males with reference G6PD activity  $\leq 10\%$  of the male median were excluded, and a new median activity was determined and used to normalize the reference data. A Kruskal Wallis test was used to compare medians between groups. Next, categorical thresholds were used to classify G6PD deficient cases (males and females with  $\leq 30\%$  activity), and females with intermediate activity ( $> 30\%$  and  $\leq 70\%$  activity).

Using pooled data from across all included studies, receiver operating characteristic (ROC) curves were generated to assess the ability of the test to discriminate G6PD deficient males and females, G6PD intermediate females, and G6PD normal males and females.

The pooled performance of the STANDARD G6PD Test against the spectrophotometric reference test for each specimen type was determined by calculating the test's sensitivity, specificity, positive predictive value (PPV), and negative predictive value (NPV) to diagnose individuals G6PD status at the 30% threshold for males and females and the 70% threshold for females [29]. All measures of diagnostic performance are presented with 95% confidence intervals (CIs). A sensitivity analysis was employed to example the effect of each individual study on pooled measures of diagnostic performance. For the purposes of this analysis, G6PD deficient and intermediate results by the reference assay were considered as true "positive", and G6PD normal results were considered as true "negatives." Specimens with enzyme activities below a defined fraction of the AMM were defined as positive results, and those that had a higher activity were defined as negative results (G6PD normal). Specimens with a measured G6PD activity below the calculated threshold activity for the reference and the test assay was defined as a true positive sample. True negative, false positive and false negative results were defined accordingly. Overall agreement between the STANDARD G6PD Test and reference assay in the classification of normal, intermediate, and deficient G6PD activity levels was calculated and Kappa coefficients were determined at the same thresholds. Agreement was assessed for the STANDARD G6PD Test's total hemoglobin (T-Hb) measurement against the reference CBC assay results where available, using clinically-relevant thresholds for anemia established by the World Health Organization (WHO) (S2 Table) [30].

All statistical analyses were performed using Stata 15.0 (StataCorp, College Station, TX).

To explore the implications of these results for malaria case management, the eligibility of the pooled study population for radical cure treatment regimens was considered. These eligibility criteria were based on the WHO recommendations regarding administration of primaquine for preventing relapse [14] as well as the product label for tafenoquine (S3 Table). Across the study population, G6PD classification by the reference assay was compared to G6PD classification by the SD Biosensor test. Next, theoretical treatment eligibility among the study population was calculated based on the results of both the reference assay and the STANDARD G6PD Test, with the former considered as the gold standard and true discriminating test while the latter was considered as the test that would determine treatment status. Based on the concordance or discordance between methods, participants were considered as either correctly or incorrectly receiving or being excluded from the recommended treatment algorithm outcome. Results are presented separately for two different treatment algorithms: 1) primaquine only, and 2) tafenoquine and primaquine, with those who were considered ineligible for

tafenoquine then considered for primaquine eligibility. No other treatment eligibility criteria (e.g., age, pregnancy, anemia status) were considered as part of the calculation.

## Results

Data from 4,212 capillary specimens and 4,844 venous specimens were included in the analysis (Table 1). The overall population was split evenly between males and females. The majority of participants with available data had either no or mild anemia. A total of 550 patients with confirmed malaria (68 with *P.falciparum*, 441 with *P.vivax*, and 41 with mixed infections) were included in the analysis.

### G6PD activity distribution

The site-specific AMMs are reported in S4 Table. Study-specific median G6PD values and interquartile ranges (IQRs) for all normal males in the analytical populations on both the reference assay and the STANDARD G6PD Test on capillary and venous specimens are presented in S5 Table. On the reference assay, the G6PD median ranged from 6.8 U/g Hb to 11.9 U/g Hb, as compared to 6.7 U/g Hb to 11.3 U/g Hb on the STANDARD G6PD Test. Across all prospective clinical studies, excluding the Thailand study (which used frozen blood samples) and the UK study (which includes newborns and primarily specimens with blood disorders), the G6PD median of the STANDARD G6PD Test was within a 1.2 U/g Hb range (range 7.3–8.5 U/g Hb), with the exception of one of the US studies (Fig 1) [19]. In Brazil and India, the study population was recruited from those seeking care for malaria (S1 Table). Both studies recruited more than 36 males with *P.vivax* active infection allowing determination of the AMM amongst *P.vivax* infected G6PD normal males. There was no significant difference in the AMM between malaria negative males and *P. vivax* positive males (Table 2). Among G6PD normal males, the median G6PD activity was significantly lower for *P. vivax* positive males compared to malaria negative males at the Kolkata, India, site, but not at the Porto Velho, Brazil, site.

Based on the 30% and 70% activity thresholds, data were available for 266 G6PD deficient, 233 G6PD intermediate, and 4,520 G6PD normal specimens (Table 1). The pooled prevalence for G6PD deficient and intermediate cases in the capillary sample analytical population was 3.4% and 2.1%, respectively (S6 Table). The pooled prevalence for G6PD deficient and intermediate cases in the venous blood analytical population was 5.4% and 4.7%, respectively (S6 Table). S2 Fig presents the distribution of G6PD activities in the study population according to the reference assay and the STANDARD G6PD Test for both males and females.

### Pooled clinical performance of the STANDARD G6PD Test for G6PD

During the studies, the STANDARD G6PD Test was run over a broad range of operating temperatures and humidities, ranging from 17.13°C to 43.7°C and 10% to 93.7%, respectively, on capillary specimens (S7 Table).

ROC curves (S3 Fig) and associated performance characteristics (S8 Table) show that the test performed well in detecting deficient individuals at the 30% activity threshold; the area under the curve (AUC) was 0.998 and 0.997 for capillary and venous specimens, respectively. At the 70% threshold for intermediate females, AUC was 0.909 for capillary and 0.954 for venous specimens.

Table 3 summarizes the pooled diagnostic performance of the STANDARD G6PD Test for identifying G6PD deficient males and females, and females with intermediate G6PD activity, by specimen type. Overall, at the 30% threshold, the test had a sensitivity of 100% for both specimen types. The specificity was 96.7% (95% CI 96.1%–97.2%) for combined venous and contrived specimens and 98.1% (95% CI 97.6%–98.5%) for capillary specimens. For females

Table 1. Summary of demographics.

|                                          | Bangladesh <sup>a</sup> | Brazil <sup>b</sup>               | Ethiopia                          | India                             | UK <sup>c</sup>     | US (2021) <sup>c</sup>            | Contrived Specimens <sup>c</sup> | US (2019) <sup>d</sup> | Thailand <sup>d</sup> | Total n (%)  |
|------------------------------------------|-------------------------|-----------------------------------|-----------------------------------|-----------------------------------|---------------------|-----------------------------------|----------------------------------|------------------------|-----------------------|--------------|
| <b>Specimen type</b>                     | Fresh venous K2EDTA     | Fresh capillary and venous K2EDTA | Fresh capillary and venous K2EDTA | Fresh capillary and venous K2EDTA | Fresh venous K2EDTA | Fresh capillary and venous K2EDTA | Contrived venous                 | Fresh venous K2EDTA    | Frozen venous K2EDTA  |              |
| Final Analytic population, n             | 108                     | 1,736                             | 1,015                             | 951                               | 167                 | 623                               | 95                               | 174                    | 150                   | 5,019        |
| Capillary Analytic population, n         | N/A                     | 1,693                             | 1,009                             | 889                               | N/A                 | 621                               | N/A                              | N/A                    | N/A                   | 4,212        |
| Venous Analytic population, n            | 108                     | 1,662                             | 1,015                             | 860                               | 167                 | 613                               | 95                               | 174                    | 150                   | 4,844        |
| <b>Sex, n (%)</b>                        |                         |                                   |                                   |                                   |                     |                                   |                                  |                        |                       |              |
| Female                                   | 81 (75.0)               | 948 (54.6)                        | 476 (46.9)                        | 345 (36.3)                        | 87 (52.1)           | 309 (49.6)                        | 90 (97.4)                        | 73 (41.9)              | 108 (72.0)            | 2,517 (50.2) |
| Male                                     | 27 (25.0)               | 788 (45.4)                        | 539 (53.1)                        | 606 (63.7)                        | 80 (47.9)           | 314 (50.4)                        | 5 (5.3)                          | 101 (58.1)             | 42 (28.0)             | 2,502 (49.8) |
| <b>G6PD status,<sup>e</sup> n (%)</b>    |                         |                                   |                                   |                                   |                     |                                   |                                  |                        |                       |              |
| Deficient < 30%                          | 30 (27.8)               | 59 (3.4)                          | 12 (1.2)                          | 27 (2.8)                          | 10 (6.0)            | 46 (7.4)                          | 3 (3.2)                          | 25 (14.4)              | 54 (36.0)             | 266 (5.3)    |
| Intermediate 30%–70%                     | 21 (19.4)               | 35 (2.0)                          | 19 (1.8)                          | 17 (1.8)                          | 10 (6.0)            | 17 (2.7)                          | 58 (61.1)                        | 10 (5.7)               | 46 (30.7)             | 233 (4.6)    |
| Normal >70%                              | 57 (52.8)               | 1,642 (94.6)                      | 984 (97.0)                        | 907 (95.4)                        | 147 (88.0)          | 560 (89.9)                        | 34 (35.8)                        | 139 (79.9)             | 50 (33.3)             | 4,520 (90.1) |
| <b>Anemia status,<sup>f</sup> n (%)</b>  |                         |                                   |                                   |                                   |                     |                                   |                                  |                        |                       |              |
| Non/mild                                 | N/A                     | 831 (47.9)                        | 473 (46.6)                        | 360 (37.9)                        | N/A                 | 410 (65.8)                        | 81 (85.3)                        | N/A                    | 143 (95.3)            | 2,298 (45.8) |
| Moderate                                 | N/A                     | 83 (4.8)                          | 1 (0.1)                           | 91 (9.6)                          | N/A                 | 23 (3.7)                          | 11 (11.6)                        | N/A                    | 7 (4.7)               | 216 (4.3)    |
| Severe                                   | N/A                     | 10 (0.6)                          | 0 (0)                             | 30 (3.2)                          | N/A                 | 1 (0.2)                           | 3 (3.2)                          | N/A                    | 0 (0)                 | 44 (0.9)     |
| Missing                                  | 108 (100.0)             | 812 (46.8)                        | 541 (53.3)                        | 470 (49.4)                        | 167 (100.0)         | 189 (30.3)                        | 0 (0)                            | 174 (100.0)            | 0 (0)                 | 2,461 (49.0) |
| <b>Malaria result,<sup>g</sup> n (%)</b> |                         |                                   |                                   |                                   |                     |                                   |                                  |                        |                       |              |
| <i>P. falciparum</i>                     | N/A                     | 12 (0.7)                          | 27 (2.7)                          | 29 (3.1)                          | N/A                 | N/A                               | N/A                              | N/A                    | N/A                   | 68 (1.4)     |
| <i>P. vivax</i>                          | N/A                     | 199 (11.5)                        | 0 (0.0)                           | 242 (25.5)                        | N/A                 | N/A                               | N/A                              | N/A                    | N/A                   | 441 (8.8)    |
| <i>P. falciparum</i> / <i>P. vivax</i>   | N/A                     | 40 (2.3)                          | 0 (0.0)                           | 1 (0.1)                           | N/A                 | N/A                               | N/A                              | N/A                    | N/A                   | 41 (0.8)     |
| Negative                                 | N/A                     | 1,484 (85.5)                      | 988 (97.3)                        | 679 (71.4)                        | N/A                 | N/A                               | N/A                              | N/A                    | N/A                   | 3,151 (62.8) |

<sup>a</sup>. Data published within [21].<sup>b</sup>. Data published within [20].<sup>c</sup>. Data published within [22].<sup>d</sup>. Data published within [19].<sup>e</sup>. G6PD status as determined by the spectrophotometric G6PD reference test on venous specimens, based on the specified activity thresholds.<sup>f</sup>. Anemia status as measured by CBC in accordance with published clinically relevant Hb concentration thresholds from WHO. The non- and mild anemia categories were combined based on the clinical significance of moderate or severe anemia diagnoses, consistent with the uses of other quantitative devices for the determination of Hb concentration at the point of care. Samples for which only HemoCue Hb 201+ results were available are not included in this summary. Additionally, samples from Bangladesh were not included because of the limitations in the granularity of the data available.<sup>g</sup>. Microscopy or rapid diagnostic test positive at recruitment.<https://doi.org/10.1371/journal.pntd.0011652.t001>

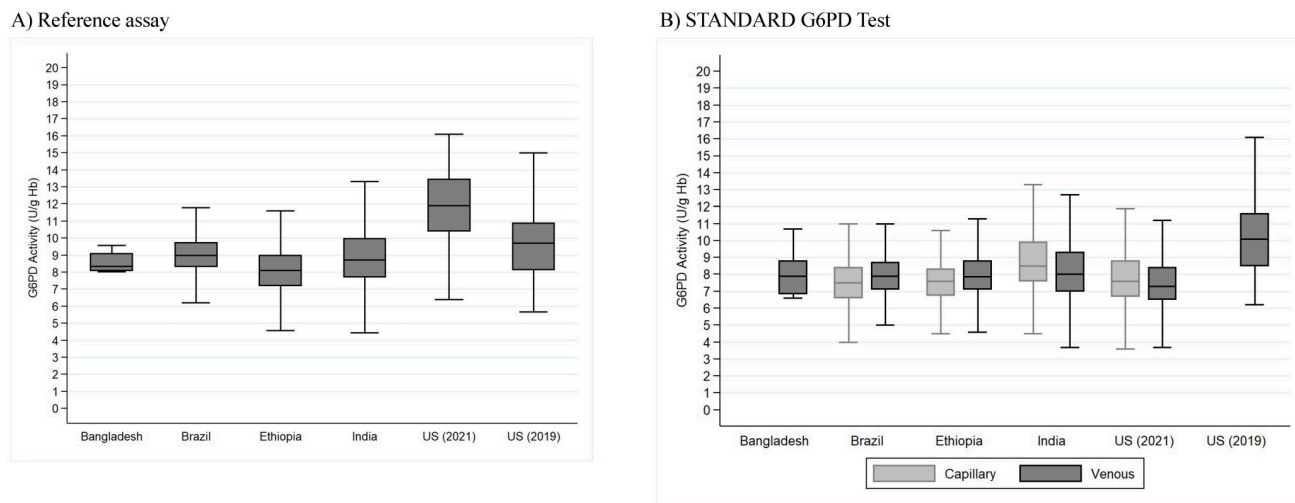

**Fig 1. Site-specific variation in G6PD activity among normal males on fresh capillary and venous specimens on A) the reference assay, and B) the STANDARD G6PD Test\*.** \* The UK study, which included newborns and samples with blood disorders, and the Thailand study, which was conducted on frozen samples, are not included in Figure 1.

<https://doi.org/10.1371/journal.pntd.0011652.g001>

with intermediate G6PD activity levels, the sensitivity was 77.0% on capillary specimens (95% CI 66.8%–85.4%), 86.6% on venous specimens excluding contrived (95% CI 80.6%–91.3%), and 89.0% on venous specimens including contrived (95% CI 85.4%–93.6%). Specificity was 92.8% for capillary specimens (95% CI 91.6%–93.9%), 94.9% for venous specimens without contrived (95% CI 93.3%–95.3%), and 93.9% for venous specimens including contrived (95% CI 92.8%–94.9%). Overall agreement was 94.8% for capillary and venous specimens, and 93.8% for venous and contrived specimens combined (S6 Table). The results of the sensitivity analysis for the pooled performance estimates are shown in S9 Table.

All true deficient individuals were correctly identified by the STANDARD G6PD Test on both venous and capillary specimens and false normal results were only observed for females with intermediate G6PD activity (Fig 2 and Table 4). On venous specimens, 10% (23/230) of intermediate females were misclassified as normal, compared to 25% (20/87) on capillary specimen (Table 4). However, the majority (60%, 12/20) of these capillary discordant results were attributed to females with reference G6PD activity greater than 60% and only two samples had G6PD activities between 40 and 50%. (S10 Table and Table 5 and S4 Fig). Negative predictive values for females with >60% reference activity were 99.6% and 99.5% for capillary and venous

**Table 2. Adjusted G6PD normal male median (AMM) and analytical population male medians on the reference assay at the Porto Velho, Brazil, and Kolkata, India, sites, by *P. vivax* malaria status.**

|                                                   | Porto Velho, Brazil |                                              | Kolkata, India    |                                              |
|---------------------------------------------------|---------------------|----------------------------------------------|-------------------|----------------------------------------------|
|                                                   | AMM                 | All Normal Males                             | AMM               | All Normal Males                             |
| Number                                            | N = 36              | N = 368 (all)<br>N = 114 ( <i>P. vivax</i> ) | N = 36            | N = 582 (all)<br>N = 197 ( <i>P. vivax</i> ) |
| Median Normal Males 100% (95% CI)                 | 8.9<br>(8.6–9.4)    | 9.1<br>(8.3–10.1)                            | 8.56<br>(7.9–9.1) | 8.7<br>(7.7–10.0)                            |
| <i>P. vivax</i> Median Normal Males 100% (95% CI) | 8.7<br>(7.8–9.4)    | 8.9<br>(8.1–9.8)                             | 8.21<br>(7.6–9.3) | 8.2<br>(7.3–9.4)                             |
| P value                                           | 0.35                | 0.08                                         | 0.24              | 0.001                                        |

<https://doi.org/10.1371/journal.pntd.0011652.t002>

**Table 3. Summary diagnostic performance of the STANDARD G6PD Test for identifying G6PD deficient males and females and females with intermediate G6PD activity, by specimen type, in all study participants and in *P. vivax* cases only.**

| Specimen Type                               | Number of cases |              |        | Performance for G6PD deficient males and females |                      |                     |                       | Performance for G6PD intermediate females (> 30, ≤ 70%) |                      |                     |                       |
|---------------------------------------------|-----------------|--------------|--------|--------------------------------------------------|----------------------|---------------------|-----------------------|---------------------------------------------------------|----------------------|---------------------|-----------------------|
|                                             | Deficient       | Intermediate | Normal | Sensitivity (95% CI)                             | Specificity (95% CI) | PPV (95% CI)        | NPV (95% CI)          | Sensitivity (95% CI)                                    | Specificity (95% CI) | PPV (95% CI)        | NPV (95% CI)          |
| Capillary                                   | 143             | 79           | 3990   | 100.0<br>(97.5–100.0)                            | 98.1<br>(97.6–98.5)  | 64.4<br>(57.7–70.7) | 100.0<br>(99.9–100.0) | 77.0<br>(66.8–85.4)                                     | 92.8<br>(91.6–93.9)  | 32.5<br>(26.2–39.4) | 98.9<br>(98.3–99.3)   |
| Venous (without contrived)                  | 259             | 110          | 4380   | 100.0<br>(98.6–100.0)                            | 97.6<br>(97.1–98.0)  | 70.2<br>(65.2–74.8) | 100.0<br>(99.9–100.0) | 86.6<br>(80.6–91.3)                                     | 94.4<br>(93.3–95.3)  | 55.4<br>(49.2–61.4) | 98.9<br>(98.3–99.3)   |
| Venous (with contrived)                     | 262             | 152          | 4430   | 100.0<br>(98.6–100.0)                            | 96.7<br>(96.1–97.2)  | 63.3<br>(58.4–67.9) | 100.0<br>(99.9–100.0) | 89.0<br>(85.4–93.6)                                     | 93.9<br>(92.8–94.9)  | 61.1<br>(55.6–66.3) | 98.9<br>(98.3–99.3)   |
| <i>P. vivax</i> -infected participants only |                 |              |        |                                                  |                      |                     |                       |                                                         |                      |                     |                       |
| Capillary                                   | 10              | 9            | 377    | 100.0<br>(69.2–100.0)                            | 97.7<br>(95.6–98.9)  | 52.6<br>(28.9–75.6) | 100.0<br>(99.0–100.0) | 100.0<br>(39.8–100.0)                                   | 87.3<br>(79.2–93.0)  | 23.5<br>(6.8–49.9)  | 100.0<br>(95.9–100.0) |
| Venous                                      | 10              | 4            | 382    | 100.0<br>(69.2–100.0)                            | 99.0<br>(97.4–99.7)  | 71.4<br>(41.9–91.6) | 100.0<br>(99.0–100.0) | 100.0<br>(39.8–100.0)                                   | 93.3<br>(86.7–97.3)  | 36.4<br>(10.9–69.2) | 100.0<br>(96.3–100.0) |

<https://doi.org/10.1371/journal.pntd.0011652.t003>

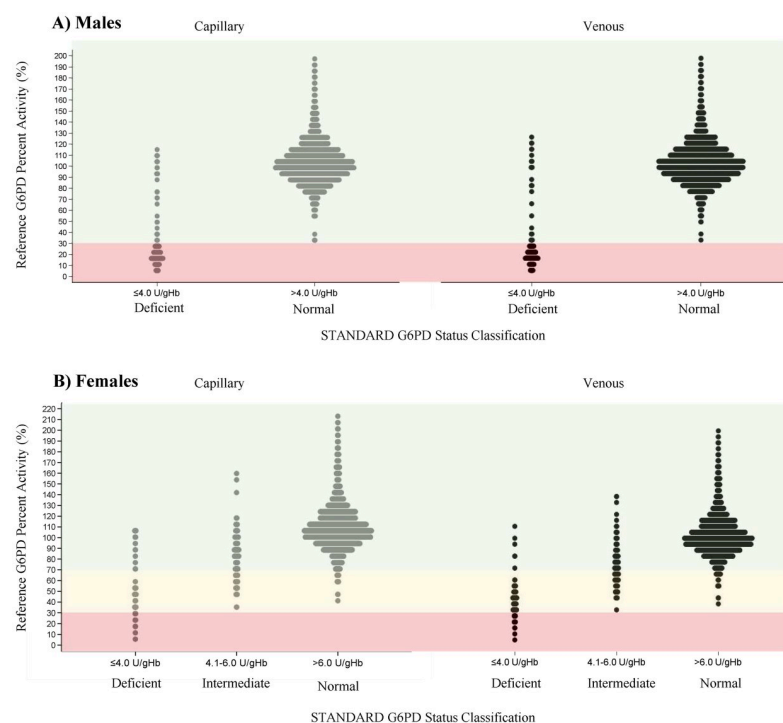

**Fig 2. G6PD activity classification of the STANDARD G6PD and reference assay for A) males and B) females.** G6PD status classification measured by the STANDARD G6PD Test is shown on the X-axis, for capillary (grey) and venous (black) specimens, respectively. Results are plotted by the reference G6PD percent activity (Y-axis). Shaded areas correspond to true G6PD normal (green), intermediate (yellow), and deficient (red) status classifications on the reference assay.

<https://doi.org/10.1371/journal.pntd.0011652.g002>

**Table 4.** 2 x 2 and 3 x 3 tables for males and female G6PD classifications respectively by the reference assay (columns) and by the STANDARD G6PD test (rows). 30% and 70% normal G6PD activity thresholds were used to classify G6PD deficient and intermediate status, respectively, with the reference spectrophotometric assay. Manufacturer thresholds on the STANDARD G6PD test were used to classify G6PD deficient and intermediate status.

| STANDARD G6PD Test Classification | Reference G6PD assay classification |              |        | Total |
|-----------------------------------|-------------------------------------|--------------|--------|-------|
| Capillary: Male                   |                                     |              |        |       |
|                                   | Deficient                           | Normal       |        | Total |
| Deficient                         | 134                                 | 30           |        | 164   |
| Normal                            | 0                                   | 2018         |        | 2018  |
| Total                             | 134                                 | 2048         |        | 2182  |
| Capillary: Female                 |                                     |              |        |       |
|                                   | Deficient                           | Intermediate | Normal | Total |
| Deficient                         | 9                                   | 30           | 19     | 58    |
| Intermediate                      | 0                                   | 37           | 120    | 157   |
| Normal                            | 0                                   | 20           | 1795   | 1815  |
| Total                             | 9                                   | 87           | 1934   | 2030  |
| Venous*: Male                     |                                     |              |        |       |
|                                   | Deficient                           | Normal       |        | Total |
| Deficient                         | 205                                 | 34           |        | 239   |
| Normal                            | 0                                   | 2144         |        | 2144  |
| Total                             | 205                                 | 2178         |        | 2383  |
| Venous*: Female                   |                                     |              |        |       |
|                                   | Deficient                           | Intermediate | Normal | Total |
| Deficient                         | 57                                  | 111          | 7      | 175   |
| Intermediate                      | 0                                   | 96           | 125    | 221   |
| Normal                            | 0                                   | 23           | 2042   | 2065  |
| Total                             | 57                                  | 230          | 2174   | 2461  |

\* Including contrived specimens

<https://doi.org/10.1371/journal.pntd.0011652.t004>

specimens (without contrived), respectively (Table 5). In contrast, false positive results (particularly for intermediates) occurred in 6% (120/1934) of G6PD normal females who were misclassified as intermediate and 1.5% (34/2178) of G6PD normal males who were misclassified as deficient on capillary specimens.

### Pooled clinical performance of the STANDARD G6PD test for G6PD among *P. vivax* confirmed cases

Among participants with *P. vivax* malaria, on both capillary and venous specimens, sensitivity was 100% (95% CI 69.2%–100%) at the 30% threshold, with specificities of 97.7% (95% CI

**Table 5.** Performance indicators applying the 6.0 U/g Hb threshold on the STANDARD G6PD Test for deficient and intermediate females with G6PD activity levels between 0% and 40%, 50%, 60%, 65%, and 70% for capillary specimens.

|                                    | % G6PD activity (reference assay) |                     |                     |                      |                       |
|------------------------------------|-----------------------------------|---------------------|---------------------|----------------------|-----------------------|
|                                    | ≤ 70%                             | ≤ 65%               | ≤ 60%               | ≤ 50%                | ≤ 40%                 |
| Sensitivity (95% CI)               | 79.2<br>(69.7–86.8)               | 84.6<br>(74.7–91.8) | 88.1<br>(77.8–94.7) | 92.3<br>(79.1–98.4)  | 100.0<br>(83.9–100.0) |
| Number of false normals            | 20                                | 12                  | 8                   | 3                    | 0                     |
| Negative predictive value (95% CI) | 98.9<br>(98.3–99.3)               | 99.3<br>(98.8–99.7) | 99.6<br>(99.1–99.8) | 99.8<br>(99.5–100.0) | 100.0<br>(99.8–100.0) |

<https://doi.org/10.1371/journal.pntd.0011652.t005>

95.6%–98.9%) and 99.0% (95% CI 97.4%–99.7%) for capillary and venous specimens, respectively (Table 3). However, it should be noted that this is based on a small number of deficient and intermediate cases ( $\leq 10$ ) within this population.

### Pooled clinical performance of the STANDARD G6PD Test for hemoglobin

Linear regression of the STANDARD G6PD Test's hemoglobin result as compared to the hemoglobin result on the reference CBC is shown in S5 Fig, by specimen type. R-squared correlation values are 0.73 and 0.76 for capillary and venous specimens, respectively. S11 Table presents the agreement between the STANDARD G6PD Test's anemia classification on both capillary and venous specimens as compared to the CBC results. Overall percent agreement between methods was 90.3% (95% CI 89.0%–91.5%) for capillary specimens and 94.3% (95% CI 93.2%–95.2%) for venous specimens (excluding contrived). None of the participants with severe anemia (Hb  $< 7.0$  g/dL for children 6–59 months of age or  $< 8.0$  g/dL for all other groups,  $n = 44$ ) were misclassified as non or mild anemia on either capillary or venous blood. The same analysis for the HemoCue against the reference CBC is shown in S6 Fig and S12 Table as a comparator. Bias was also calculated for both the STANDARD G6PD Test and the HemoCue as the mean hemoglobin concentration as determined by CBC minus the relevant index test, by sample type (S13 Table).

### Implications for malaria treatment

The STANDARD G6PD test results on capillary specimens were used to calculate the implications of the test performance on eligibility to different radical cure treatment options. Fig 3A

#### Treatment Algorithm 1: Primaquine eligibility\*

##### A. STANDARD G6PD Test result and corresponding treatment eligibility

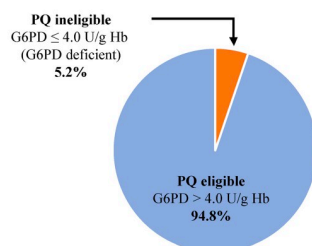

##### B. Treatment outcome when considering results of the reference assay

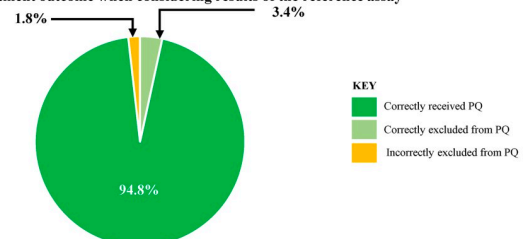

#### Treatment Algorithm 2: Tafenoquine and primaquine eligibility\*

##### C. STANDARD G6PD Test result and corresponding treatment eligibility

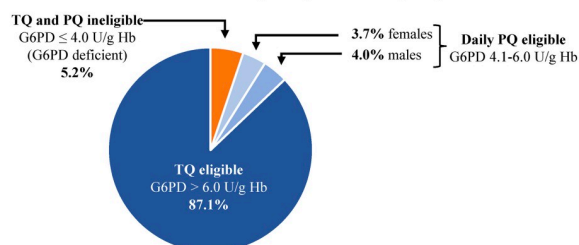

##### D. Treatment outcome when considering results of the reference assay

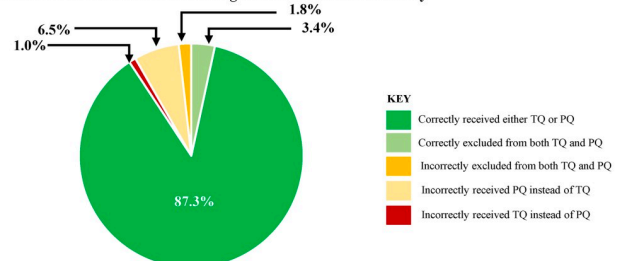

**Fig 3. Participant eligibility and outcomes for radical cure treatment options based on the results of the STANDARD G6PD Test on capillary specimens.** Panels A and B represent eligibility and outcomes for daily primaquine regimen. Panels C and D represent eligibility and outcomes for tafenoquine and daily primaquine, with those who are considered ineligible for tafenoquine then considered for primaquine eligibility. Abbreviations: G6PD, glucose-6-phosphate-dehydrogenase; PQ, Primaquine; Hb, Hemoglobin; TQ, Tafenoquine. \* No other treatment eligibility criteria (e.g., age, anemia status, pregnancy status) were considered as part of the calculation.

<https://doi.org/10.1371/journal.pntd.0011652.g003>

and 3B illustrate a scenario where only daily primaquine radical cure regimen is available to males and females with G6PD activity greater than 30%. Based on the results of the STANDARD G6PD test, 94.8% (3993/4212) of the participants, representing all G6PD normal and intermediate participants, would be eligible for standard daily primaquine according to WHO guidelines and correctly provided primaquine based on the concordance between the reference and POC test. Conversely, 5.2% (219/4212) would be excluded from standard primaquine treatment (Fig 3B). No G6PD deficient participants would be prescribed primaquine, but 1.8% (76/4212) males and females with intermediate and normal G6PD activity would be excluded from the daily treatment regimen (Fig 3B and S14 Table).

Fig 3C and 3D illustrate a scenario where both daily primaquine and single dose tafenoquine are available and tafenoquine is only available to males and females with G6PD activity greater than 70%. Based on the POC STANDARD G6PD test results 87.1% (3668/4212) of participants in the study population would be eligible for single dose radical cure (Fig 3C). One percent (43/4212) of the population with G6PD activity  $\leq 70\%$  would receive tafenoquine. These were 23 males and 20 females with G6PD activity between 30–70%, with a median G6PD activity of 63%. This analysis found that 7.7% of the population (168 males and 157 females) had a STANDARD G6PD Test result between 4 and 6 U/g Hb and would be eligible for standard daily primaquine. All of these participants had a reference G6PD activity  $> 30\%$ . Of these, 6.5% of the total population (153 males and 120 females) had a reference G6PD activity  $> 70\%$  and could have been treated with tafenoquine (Fig 3D and S14 Table).

## Discussion

In this paper, performance data for the STANDARD G6PD POC test for G6PD deficiency was consolidated from multiple studies conducted on both capillary and venous specimens across seven countries, representing diverse settings and use cases for G6PD testing.

### Application of universal thresholds

Performance estimates for the STANDARD G6PD Test were calculated by applying a single set of thresholds for G6PD deficiency and female intermediate activity in U/g Hb, as indicated by the manufacturer's IFU. Of note, the thresholds for G6PD deficient and intermediate levels were initially established at 3.9 and 6.0 U/gHb respectively prior to completion of the Brazil and US prospective studies. The same thresholds were then minimally updated to 4.0 and 6.0 U/gHb in the subsequent version of the IFU and used prior to the pooled analysis presented here. For the reference assay, site-specific adjusted male medians were used to normalize results and establish 30% and 70% G6PD activity thresholds for defining deficient, intermediate, and normal cases. The male median G6PD activity on the POC test was more consistent across sites and specimen types—with the exception of one US site—in comparison to the reference assay, which showed greater site-to-site variability. Inter-site variability in the male median G6PD activity as defined by spectrophotometry has been described previously, [12,27] and is apparent even between sites testing the same specimens [22]. Site-to-site reproducibility of the STANDARD G6PD Test conducted on commercially available controls also has decreased variability compared to the reference assay conducted on the same control reagents in the same laboratories [31]. However, it is important to note with respect to the medians and thresholds that the populations of the studies in this analysis largely comprised of adults and children over the age of two. Only one study (in the United Kingdom) included few newborn samples. Using the STANDARD G6PD Test for newborn screening applications will require the use of higher G6PD threshold values to account for

the higher G6PD activity among newborns [32–35]. A recent study conducted in Thailand with the STANDARD G6PD Test on 307 cord blood samples showed good performance as long as the thresholds are adjusted to address the higher median G6PD activities in newborns [36]. A recent report suggests that malaria infection may also result in increased G6PD activity when looking across all malaria in deficient and intermediate cases [37]. However, in our analysis, there was no overall change in G6PD activity when comparing *P. vivax*-infected and uninfected males with normal G6PD activity. The male median G6PD value on the STANDARD G6PD test is statistically consistent across varied contexts and populations (aged two years and older), including in malaria-endemic settings, with the exception of newborns.

### Clinical implications for malaria case management

From a safety perspective, the sensitivity and negative predictive values of POC G6PD tests to identify G6PD deficient and intermediate cases are critical to minimize adverse reactions to drugs that are contraindicated in individuals with G6PD deficiency. This is particularly relevant for the test's use in malaria case management, as standard 14-day primaquine regimens used for the radical cure of *P. vivax* malaria are not recommended for G6PD deficient males and females, [38,39] and safety of higher dose regimens among G6PD intermediate females is also a concern [40]. Additionally, tafenoquine is the first drug to indicate a threshold G6PD activity (70%) on its label, above which data indicates that it is considered safe to prescribe for radical cure [26,41]. The calculations above suggest that the use of the STANDARD G6PD Test at the point of care reduce risk of drug related hemolysis and so facilitate appropriate provision of treatment, in line with WHO and global treatment guidelines.

The STANDARD G6PD Test showed good performance both on capillary and venous samples for G6PD deficiency when applying the manufacturer's universal thresholds, and no G6PD deficient cases were misclassified as normal, which ensures G6PD deficient malaria patients will receive correct primaquine regimens. In fact, the STANDARD G6PD Test tends toward overestimation of G6PD deficiency at the deficient and intermediate thresholds as compared to the reference assay (S6 Table). For hemoglobin, although the test performance compared to the reference CBC was lower than for the HemoCue, overall patterns of misclassification were similar and this did not significantly impact clinical classifications of anemia.

The test's sensitivity decreased for females with intermediate activity. However, most of the false normal results were attributed to females with G6PD activities >60%, (and all of whom had activities >40%), which means that they are less likely to experience severe hemolysis as the potential for severe clinical outcomes increases among those with more severe deficiency (i.e., a low percent G6PD activity). The negative predictive values for females with G6PD reference activity >60% is good at 99.6% and 99.5% for both capillary and venous specimens, respectively. Among the almost 400 *P. vivax* cases included in this analysis, none of the deficient or intermediate cases were incorrectly classified as normal by the STANDARD G6PD Test. However, it should be noted that very few deficient and intermediate *P. vivax*-positive cases were included in this sample.

Of note, challenges associated with false normal G6PD results are not limited to POC tests. For context, a recent report from the College of American Pathologists (CAP) highlights challenges with the accurate diagnosis of specimens with intermediate G6PD activity in current reference clinical laboratory testing [11]. Among laboratories participating in the CAP proficiency testing, 12.5% of those conducting quantitative reference testing misclassified an intermediate specimen as normal, and 47.8% of those conducting qualitative testing misclassified it as normal [11]. These findings suggest that misclassifications of G6PD intermediate specimens

are not unique to POC tests and that accurate classification of this group is a challenge in clinical laboratory testing.

The specificity of a POC G6PD test is also important when considering performance, as such tests may result in valuable treatment options being withheld from individuals without contraindications. Because of the typically low prevalence of G6PD deficiency in many populations, any decrease in specificity will significantly reduce the positive predictive power of the test with a significant proportion of G6PD deficient and intermediate cases assigned by the POC test actually being G6PD normal individuals. This was observed in the data presented here, where false deficient or intermediate misclassifications on the STANDARD G6PD Test were more common than false normal results. Data from settings where the STANDARD G6PD test has been scaled up and used outside the context of closely monitored clinical studies indicates that the proportion of false deficient and intermediate cases appears to increase. In the context of malaria, an overestimation of G6PD deficiency may prompt concerns about unnecessarily restricting access to radical cure and higher levels of onward transmission and relapses.

### Implications for malaria programs and future research

Results from this pooled performance analysis will inform future implementation and operational research efforts for this test. One recent usability study conducted among intended test users from three high malaria burden settings found that, with appropriate training, the test can be used in clinics managing malaria cases [42]. Recent studies also suggest that the incorporation of the test into *P. vivax* case management in Brazil and Laos is cost effective; however, factors such as clinic case burdens and G6PD deficiency prevalence are important considerations [43,44]. Together, these performance, usability, and cost-effectiveness findings suggest that the STANDARD G6PD Test can be used in malaria endemic settings to support G6PD classification and significantly reduce the risk of drug induced hemolysis when prescribing primaquine or tafenoquine, as well as other drugs such as rasburicase [45].

However, the positive predictive power of the test among this population, where a significant proportion of individuals classified as G6PD deficient by the STANDARD test are in fact normal represents an operational challenge in settings where confirmatory testing cannot be conducted. As is common for many POC tests, confirmatory testing at a reference laboratory is also recommended if the test indicates a positive result for the disease status [39,46]. However, where a POC test has the most clinical utility, access to reference confirmatory testing is unlikely. One must consider how to appropriately counsel patients regarding the interpretation of their results.

This and the above limitations in test sensitivity need to be considered in the overall risk benefit assessment of G6PD screening at the point of care, which should also take into consideration local G6PD prevalence and vivax epidemiology as well as other drug eligibility criteria. Additional safety and operational studies may be warranted. Future operational studies should investigate whether testing strategies that involve repeat testing over two or three consecutive occasions can improve confirmation of true G6PD deficient cases and the effective positive predictive value specially in settings with low prevalence in G6PD deficiency. Additionally, given the extremely high negative predictive value (100% for individuals >30% G6PD activity), exploring approaches to retain patients' G6PD test results could reduce the need for repeat testing for the vast majority of the population, potentially leading to significant cost savings. Finally, the feasibility of using the G6PD test at the community level where malaria care-seeking often takes place will be critical to inform adoption strategies and scale.

## Limitations

There are limitations to this analysis. The different studies contributing to this analysis were not originally designed as a multi-center clinical study, and this pooled analysis was not prospectively planned for all studies. However, the homogeneity in the designs of the included studies with regard to testing methods, data collection, and reporting allows for combining of the data. This approach is supported by the results of the sensitivity analysis (S9 Table). Importantly, all included studies used one of two compatible reference assays, the Trinity or the Point Scientific spectrophotometric reagent kits, which are based on the same chemistry [47]. Further, a systematic literature search was not employed to identify included studies. Lastly, our analysis includes fewer data generated from capillary specimens than venous specimens. However, studies that evaluated test performance on capillary specimens included several that were collected from POC settings in malaria endemic countries—Ethiopia, India, and Brazil—and specifically clinics managing malaria cases.

In summary, this pooled analysis supports the use of the STANDARD G6PD Test in near-patient settings where rapid turnaround screening for G6PD status is needed to inform patient care and has previously been unavailable. Operational and costing considerations should inform uptake of the test in specific settings [48].

## Supporting information

**S1 Table. Summary of included studies.**

(DOCX)

**S2 Table. Hemoglobin ranges for anemia (g/dL).**

(DOCX)

**S3 Table. STANDARD G6PD Test result classifications and WHO recommendations for treatment eligibility with Primaquine or Tafenoquine.**

(DOCX)

**S4 Table. Site-specific adjusted male medians (AMMs) used for reference-assay threshold determination.**

(DOCX)

**S5 Table. Median G6PD values and interquartile ranges from all normal males in the analytical populations\*, by site.**

(DOCX)

**S6 Table. Contingency tables showing agreement in case counts across the STANDARD G6PD Test and the reference assay using the manufacturer's threshold values at 30% and 70% G6PD activity thresholds, on A) capillary specimens, B) venous specimens (excluding contrived), and C) Venous specimens (including contrived).**

(DOCX)

**S7 Table. Descriptive statistics of the operating temperatures (degrees Celsius) and humidities (%) under which the STANDARD G6PD Test was run, by specimen type.**

(DOCX)

**S8 Table. Areas under the curve (AUC) for receiver operating characteristics (ROC) analysis of the performance of the STANDARD G6PD Test for G6PD activity against the reference test for G6PD-deficient males and females as well as intermediate females, by**

**specimen type.**  
(DOCX)

**S9 Table. Sensitivity analysis for diagnostic performance on a) capillary, and b) venous specimens.**  
(DOCX)

**S10 Table. Summary of discordant false negative results on A) Capillary specimens and B) Venous specimens\*.**  
(DOCX)

**S11 Table. Contingency tables showing agreement in classification of anemia status between the STANDARD G6PD Test and the reference Complete Blood Count (CBC) T-Hb measurement for a) Capillary specimens and b) Venous specimens (excluding contrived).**  
(DOCX)

**S12 Table. Contingency tables showing agreement in classification of anemia status between the HemoCue and the reference Complete Blood Count (CBC) T-Hb measurement for a) Capillary specimens and b) Venous specimens (excluding contrived).**  
(DOCX)

**S13 Table. Difference in mean hemoglobin concentration for the STANDARD G6PD Test and the HemoCue 201+ system, for a) pooled estimates, and b) study-specific estimates.**  
(DOCX)

**S14 Table. 3x3 agreement tables between the STANDARD G6PD Test and the reference assay G6PD percent activity, on capillary specimens for A. males, and B. females.**  
(DOCX)

**S1 Fig. Summary of testing and workflow of included studies.**  
(TIFF)

**S2 Fig. Histograms showing the distribution of G6PD activities in the study population according to A) the reference assay and the STANDARD G6PD Test on B) Capillary and C) Venous specimens. The frequency is plotted in 10% increments for males and females. The 30% and 70% activity limits are indicated on each plot.**  
(TIFF)

**S3 Fig. ROC curves at 30% and 70% G6PD activity thresholds on A) capillary specimens and B) venous specimens.**  
(TIFF)

**S4 Fig. Distribution of false normal capillary test results, by study\*.**  
(TIFF)

**S5 Fig. Regression analysis of STANDARD G6PD Test total hemoglobin measurement on A) capillary specimens, and B) venous specimens compared to complete blood count.**  
(TIF)

**S6 Fig. Regression analysis of HemoCue total hemoglobin measurement on A) capillary specimens, and B) venous specimens compared to complete blood count.**  
(TIF)

## Author Contributions

**Conceptualization:** Sampa Pal, Gonzalo J. Domingo, Benedikt Ley, Ric N. Price, Emily Gerth-Guyette.

**Data curation:** Pooja Bansil.

**Formal analysis:** Wondimagegn Adissu, Jane Myburg, Mohammad Shafiul Alam, Germana Bancone, Pooja Bansil, Sampa Pal, Stephanie Zobrist, Gonzalo J. Domingo, Benedikt Ley, Emily Gerth-Guyette.

**Funding acquisition:** Gonzalo J. Domingo, Benedikt Ley, Ric N. Price.

**Investigation:** Wondimagegn Adissu, Marcelo Brito, Eduardo Garbin, Marcela Macedo, Sandip Kumar Mukherjee, Jane Myburg, Germana Bancone, Sampa Pal, Andrew Bryan, Cindy S. Chu, Gonzalo J. Domingo, Amanda Hann, Marcus V. G. Lacerda, Mark Layton, Benedikt Ley, Sean C. Murphy, Dhélio Pereira, Ric N. Price.

**Methodology:** Jane Myburg, Mohammad Shafiul Alam, Germana Bancone, Pooja Bansil, Sampa Pal, Stephanie Zobrist, Gonzalo J. Domingo, Marcus V. G. Lacerda, Mark Layton, Benedikt Ley, Sean C. Murphy, Dhélio Pereira, Ric N. Price, Arunansu Talukdar, Daniel Yilma, Emily Gerth-Guyette.

**Project administration:** Wondimagegn Adissu, Marcelo Brito, Eduardo Garbin, Marcela Macedo, Jane Myburg, Mohammad Shafiul Alam, Germana Bancone, Sampa Pal, Stephanie Zobrist, Andrew Bryan, Cindy S. Chu, Gonzalo J. Domingo, Amanda Hann, James Kublin, Marcus V. G. Lacerda, Mark Layton, Benedikt Ley, Sean C. Murphy, Francois Nosten, Dhélio Pereira, Ric N. Price, Arunansu Talukdar, Daniel Yilma, Emily Gerth-Guyette.

**Resources:** Wondimagegn Adissu, Marcelo Brito, Jane Myburg, Mohammad Shafiul Alam, Germana Bancone, Cindy S. Chu, Gonzalo J. Domingo, Amanda Hann, James Kublin, Marcus V. G. Lacerda, Mark Layton, Benedikt Ley, Sean C. Murphy, Francois Nosten, Dhélio Pereira, Arunansu Talukdar, Daniel Yilma.

**Supervision:** Wondimagegn Adissu, Marcelo Brito, Wuelton Monteiro, Mohammad Shafiul Alam, Germana Bancone, Sampa Pal, Abhijit Sharma, Stephanie Zobrist, Cindy S. Chu, Santasabuj Das, Gonzalo J. Domingo, James Kublin, Marcus V. G. Lacerda, Dhélio Pereira, Daniel Yilma, Emily Gerth-Guyette.

**Visualization:** Pooja Bansil, Stephanie Zobrist, Gonzalo J. Domingo.

**Writing – original draft:** Stephanie Zobrist, Gonzalo J. Domingo, Emily Gerth-Guyette.

**Writing – review & editing:** Wondimagegn Adissu, Marcelo Brito, Eduardo Garbin, Marcela Macedo, Wuelton Monteiro, Sandip Kumar Mukherjee, Jane Myburg, Mohammad Shafiul Alam, Germana Bancone, Pooja Bansil, Sampa Pal, Abhijit Sharma, Stephanie Zobrist, Andrew Bryan, Cindy S. Chu, Santasabuj Das, Gonzalo J. Domingo, Amanda Hann, James Kublin, Marcus V. G. Lacerda, Mark Layton, Benedikt Ley, Sean C. Murphy, Francois Nosten, Dhélio Pereira, Ric N. Price, Arunansu Talukdar, Daniel Yilma, Emily Gerth-Guyette.

## References

1. Luzzatto L, Ally M, Notaro R. Glucose-6-phosphate dehydrogenase deficiency. *Blood*. 2020; 136(11):1225–1240. <https://doi.org/10.1182/blood.2019000944> PMID: 32702756
2. Luzzatto L, Arese P. Favism and Glucose-6-Phosphate Dehydrogenase Deficiency. *N Engl J Med*. 2018; 378(1):60–71. <https://doi.org/10.1056/nejmra1708111> PMID: 29298156

3. Aydemir D, Dağlıoğlu G, Candevir A, Kurtaran B, Bozdogan ST, Inal TC, et al. COVID-19 may enhance risk of thrombosis and hemolysis in the G6PD deficient patients. *Nucleosides Nucleotides Nucleic Acids*. 2021; 40(5):505–517. <https://doi.org/10.1080/15257770.2021.1897457> PMID: 33719907
4. Elafy M, Adly A, Eltonbary K, Elghamry I, Elafy O, Maebid M, et al. Management of children with glucose-6-phosphate dehydrogenase deficiency presenting with acute haemolytic crisis during the SARS-CoV-2 pandemic. *Vox Sang*. 2022; 117(1):80–86. <https://doi.org/10.1111/vox.13123> PMID: 34105166
5. Dean L, Kane M. Rasburicase Therapy and G6PD and CYB5R Genotype. National Center for Biotechnology Information (US); 2020. Accessed May 13, 2022. <https://www.ncbi.nlm.nih.gov/books/NBK562585/>
6. Chu CS, Hwang J. Tafenoquine: a toxicity overview. *Expert Opin Drug Saf*. 2021; 20(3):349–362. <https://doi.org/10.1080/14740338.2021.1859476> PMID: 33306921
7. Chu CS, Bancone G, Nosten F, White NJ, Luzzatto L. Primaquine-induced haemolysis in females heterozygous for G6PD deficiency. *Malar J*. 2018; 17(1):101. <https://doi.org/10.1186/s12936-018-2248-y> PMID: 29499733
8. Cunningham AD, Hwang S, Mochly-Rosen D. G6PD deficiency and the need for a novel treatment to prevent kernicterus. *Clin Perinatol*. 2016; 43(2):341–354. <https://doi.org/10.1016/j.clp.2016.01.010> PMID: 27235212
9. Kaplan M, Hammerman C. Glucose-6-phosphate dehydrogenase deficiency and severe neonatal hyperbilirubinemia: a complexity of interactions between genes and environment. *Semin Fetal Neonatal Med*. 2010; 15(3):148–156. <https://doi.org/10.1016/j.siny.2009.10.007> PMID: 19942489
10. Olusanya BO, Emokpae AA, Zamora TG, Slusher TM. Addressing the burden of neonatal hyperbilirubinaemia in countries with significant glucose-6-phosphate dehydrogenase deficiency. *Acta Paediatr Oslo Nor* 1992. 2014; 103(11):1102–1109. <https://doi.org/10.1111/apa.12735> PMID: 24990658
11. Genzen JR, Nwosu A, Long T, Murphy H, Alter DN. An International Survey of Glucose-6-Phosphate Dehydrogenase Laboratory Reporting Practices. *Arch Pathol Lab Med*. Published online January 28, 2022. <https://doi.org/10.5858/arpa.2021-0276-CP>
12. Pfeffer DA, Ley B, Howes RE, Adu P, Alam MS, Bansil P, et al. Quantification of glucose-6-phosphate dehydrogenase activity by spectrophotometry: A systematic review and meta-analysis. *PLoS Med*. 2020; 17(5):e1003084. <https://doi.org/10.1371/journal.pmed.1003084> PMID: 32407380
13. Anderle A, Bancone G, Domingo GJ, Gerth-Guyette E, Pal S, Satyagraha AW. Point-of-Care Testing for G6PD Deficiency: Opportunities for Screening. *Int J Neonatal Screen*. 2018; 4(4):34. <https://doi.org/10.3390/ijns4040034> PMID: 31709308
14. World Health Organization. Guide to G6PD deficiency rapid diagnostic testing to support P. vivax radical cure. Published online 2018. Licence: CC BY-NC-SA 3.0 IGO.
15. Recht J, Ashley EA, White NJ. Use of primaquine and glucose-6-phosphate dehydrogenase deficiency testing: Divergent policies and practices in malaria endemic countries. *PLoS Negl Trop Dis*. 2018; 12(4):e0006230. <https://doi.org/10.1371/journal.pntd.0006230> PMID: 29672516
16. Ley B, Satyagraha AW, Rahmat H, von Fricken ME, Douglas NM, Pfeffer DA, et al. Performance of the Access Bio/CareStart rapid diagnostic test for the detection of glucose-6-phosphate dehydrogenase deficiency: A systematic review and meta-analysis. *PLOS Med*. 2019; 16(12):e1002992. <https://doi.org/10.1371/journal.pmed.1002992> PMID: 31834890
17. LaRue N, Kahn M, Murray M, Leader BT, Bansil P, McGray S, et al. Comparison of Quantitative and Qualitative Tests for Glucose-6-Phosphate Dehydrogenase Deficiency. *Am J Trop Med Hyg*. 2014; 91(4):854–861. <https://doi.org/10.4269/ajtmh.14-0194> PMID: 25071003
18. Osorio L, Carter N, Arthur P, Bancone G, Gopalan S, Gupta SK, et al. Performance of BinaxNOW G6PD deficiency point-of-care diagnostic in P. vivax-infected subjects. *Am J Trop Med Hyg*. 2015; 92(1):22–27. <https://doi.org/10.4269/ajtmh.14-0298> PMID: 25385861
19. Pal S, Bansil P, Bancone G, Hrutkay S, Kahn M, Gornsawun G, et al. Evaluation of a Novel Quantitative Test for Glucose-6-Phosphate Dehydrogenase Deficiency: Bringing Quantitative Testing for Glucose-6-Phosphate Dehydrogenase Deficiency Closer to the Patient. *Am J Trop Med Hyg*. 2019; 100(1):213–221. <https://doi.org/10.4269/ajtmh.18-0612> PMID: 30350771
20. Zobrist S, Brito M, Garbin E, Monteiro WM, Clementino Freitas S, Macedo M, et al. Evaluation of a point-of-care diagnostic to identify glucose-6-phosphate dehydrogenase deficiency in Brazil. *PLoS Negl Trop Dis*. 2021; 15(8):e0009649. <https://doi.org/10.1371/journal.pntd.0009649> PMID: 34383774
21. Alam MS, Kibria MG, Jahan N, Thriemer K, Hossain MS, Douglas NM, et al. Field evaluation of quantitative point of care diagnostics to measure glucose-6-phosphate dehydrogenase activity. *PLoS ONE*. 2018; 13(11):e0206331. <https://doi.org/10.1371/journal.pone.0206331> PMID: 30388146
22. Pal S, Myburgh J, Bansil P, Hann A, Robertson L, Gerth-Guyette E, et al. Reference and point-of-care testing for G6PD deficiency: Blood disorder interference, contrived specimens, and fingerstick

- equivalence and precision. PLoS ONE. 2021; 16(9):e0257560. <https://doi.org/10.1371/journal.pone.0257560> PMID: 34543346
23. Domingo G. Validation of a diagnostic to identify G6PD deficiency in western Ethiopia [dataset]. Harvard Dataverse. 2023a. <https://doi.org/10.7910/DVN/XJTFXX>
  24. Domingo G. Facility based validation of point of care tests to detect G6PD deficiency in eastern India [dataset]. Harvard Dataverse. 2023b. <https://doi.org/10.7910/DVN/5EQ9CD>
  25. Roper DR, De la Salle B, Soni V, Fletcher K, Green JA. Abrogation of red blood cell G6PD enzyme activity through Heat treatment: development of survey material for the UK NEQAS G6PD scheme. *Int J Lab Hematol*. 2017; 39(3):308–316. <https://doi.org/10.1111/ijlh.12627> PMID: 28318100
  26. Lacerda MVG, Llanos-Cuentas A, Krudsood S, Lon C, Sauders DL, Mohammed R, et al. Single-Dose Tafenoquine to Prevent Relapse of Plasmodium vivax Malaria. *N Engl J Med*. 2019; 380(3):215–228. <https://doi.org/10.1056/NEJMoa1710775> PMID: 30650322
  27. Calvaresi EC, Genzen JR. Evaluating Percentage-Based Reporting of Glucose-6-Phosphate Dehydrogenase (G6PD) Enzymatic Activity. *Am J Clin Pathol*. 2020; 154(2):248–254. <https://doi.org/10.1093/ajcp/aqaa040> PMID: 32405645
  28. Ley B, Bancone G, von Seidlein L, Threimer K, Richards JS, Domingo GJ, et al. Methods for the field evaluation of quantitative G6PD diagnostics: a review. *Malar J*. 2017; 16(1):361. <https://doi.org/10.1186/s12936-017-2017-3> PMID: 28893237
  29. Domingo GJ, Satyagraha AW, Anvikar A, Baird K, Bancone G, Bansil P, et al. G6PD testing in support of treatment and elimination of malaria: recommendations for evaluation of G6PD tests. *Malar J*. 2013; 12(1):391. <https://doi.org/10.1186/1475-2875-12-391> PMID: 24188096
  30. World Health Organization. Haemoglobin Concentrations for the Diagnosis of Anaemia and Assessment of Severity. World Health Organization; 2011. Accessed March 15, 2021. <https://www.who.int/vmnis/indicators/haemoglobin.pdf>
  31. Ley B, Winasti Satyagraha A, Kibria MG, Armstrong J, Bancone G, Bei AK, et al. Repeatability and reproducibility of a handheld quantitative G6PD diagnostic. *PLoS Negl Trop Dis*. 2022; 16(2):e0010174. <https://doi.org/10.1371/journal.pntd.0010174> PMID: 35176015
  32. Fu C, Luo S, Li Q, Xie B, Yang Q, Gen G, et al. Newborn screening of glucose-6-phosphate dehydrogenase deficiency in Guangxi, China: determination of optimal cutoff value to identify heterozygous female neonates. *Sci Rep*. 2018; 8(1):833. <https://doi.org/10.1038/s41598-017-17667-6> PMID: 29339739
  33. Riskin A, Gery N, Kugelman A, Hemo M, Spevak I, Bader D. Glucose-6-phosphate dehydrogenase deficiency and borderline deficiency: association with neonatal hyperbilirubinemia. *J Pediatr*. 2012; 161(2):191–6.e1. <https://doi.org/10.1016/j.jpeds.2012.02.018> PMID: 22459229
  34. Doherty AN, Kring EA, Posey YF, Maisels MJ. Glucose-6-phosphate dehydrogenase activity levels in white newborn infants. *J Pediatr*. 2014; 164(6):1416–1420. <https://doi.org/10.1016/j.jpeds.2014.02.029> PMID: 24679610
  35. Kaplan M, Abramov A. Neonatal Hyperbilirubinemia Associated With Glucose-6-Phosphate Dehydrogenase Deficiency in Sephardic-Jewish Neonates: Incidence, Severity, and the Effect of Phototherapy. *Pediatrics*. 1992; 90(3):401–405. <https://doi.org/10.1542/peds.90.3.401> PMID: 1518696
  36. Bancone G, Gilder ME, Win E, Gornawun G, Penpitchaporn P, Moo PK, et al. Quantitative G6PD point-of-care test can be used reliably on cord blood to identify male and female newborns at increased risk of neonatal hyperbilirubinaemia: a mixed method study. *medRxiv*. <https://doi.org/10.1101/2022.07.03.22277173>
  37. Ley B, Alam MS, Satyagraha AW, Phru CS, Thriemer K, Tadesse D, et al. Variation in Glucose-6-Phosphate Dehydrogenase activity following acute malaria. *PLoS Negl Trop Dis*. 2022; 16(5):e0010406. <https://doi.org/10.1371/journal.pntd.0010406> PMID: 35544453
  38. Milligan R, Daher A, Villanueva G, Bergman H, Graves PM. Primaquine alternative dosing schedules for preventing malaria relapse in people with Plasmodium vivax. *Cochrane Database Syst Rev*. 2020; 8:CD012656. <https://doi.org/10.1002/14651858.CD012656.pub3> PMID: 32816320
  39. Chu CS, Bancone G, Kelley M, Advani N, Domingo GJ, Cutiongo-de la Paz EM, et al. Optimizing G6PD testing for Plasmodium vivax case management and beyond: why sex, counseling, and community engagement matter. *Wellcome Open Res*. 2020; 5:21. <https://doi.org/10.12688/wellcomeopenres.15700.2> PMID: 32766454
  40. Taylor WRJ, Thriemer K, von Seidlein L, Yuentrakul P, Assawariyathipat T, Assefa A, et al. Short-course primaquine for the radical cure of Plasmodium vivax malaria: a multicentre, randomised, placebo-controlled non-inferiority trial. *The Lancet*. 2019; 394(10202):929–938. [https://doi.org/10.1016/S0140-6736\(19\)31285-1](https://doi.org/10.1016/S0140-6736(19)31285-1) PMID: 31327563

41. Llanos-Cuentas A, Lacerda MVG, Hien TT, Vélez ID, Namaik-Larp C, Chu CS, et al. Tafenoquine versus Primaquine to Prevent Relapse of Plasmodium vivax Malaria. *N Engl J Med*. 2019; 380(3):229–241. <https://doi.org/10.1056/NEJMoa1802537> PMID: 30650326
42. Gerth-Guyette E, Adissu W, Brito M, Garbin E, Macedo M, Sharma A, et al. Usability of a point-of-care diagnostic to identify glucose-6-phosphate dehydrogenase deficiency: a multi-country assessment of test label comprehension and results interpretation. *Malar J*. 2021; 20(1):307. <https://doi.org/10.1186/s12936-021-03803-1> PMID: 34238299
43. Aung YN, Tun STT, Vanisaveth V, Chindavongsa K, Kanya L. Cost-effectiveness analysis of G6PD diagnostic test for Plasmodium vivax radical cure in Lao PDR: An economic modelling study. *PLoS One*. 2022; 17(4):e0267193. <https://doi.org/10.1371/journal.pone.0267193> PMID: 35468145
44. Brito-Sousa JD, Peixoto HM, Devine A, Silva-Neto AV, Balieiro PCS, Sampaio VS, et al. Real-life quantitative G6PD screening in Plasmodium vivax patients in the Brazilian Amazon: A cost-effectiveness analysis. *PLoS Negl Trop Dis*. 2022; 16(3):e0010325. <https://doi.org/10.1371/journal.pntd.0010325> PMID: 35324892
45. Ganapathi M, Campbell P, Ofori K, Aggarwal V, Francis RO, Kratz A. Impact of pre-emptive rapid testing for glucose-6-phosphate dehydrogenase deficiency prior to rasburicase administration at a tertiary care centre: A retrospective study. *Br J Clin Pharmacol*. Published online April 2022 14, <https://doi.org/10.1111/bcp.15353> PMID: 35419830
46. Domingo GJ, Advani N, Satyagraha AW, Sibley CH, Rowley E, Kalnoky M, et al. Addressing the gender-knowledge gap in glucose-6-phosphate dehydrogenase deficiency: challenges and opportunities. *Int Health*. 2019; 11(1):7–14. <https://doi.org/10.1093/inthealth/ihy060> PMID: 30184203
47. Alam MS, Kibria MG, Jahan N, Price RN, Ley B. Spectrophotometry assays to determine G6PD activity from Trinity Biotech and Pointe Scientific G6PD show good correlation. *BMC Res Notes*. 2018; 11(1):855. <https://doi.org/10.1186/s13104-018-3964-7> PMID: 30514365
48. Engel N, Ghergu C, Matin MA, Kibria MG, Thriemer K, Price RN, et al. Implementing radical cure diagnostics for malaria: user perspectives on G6PD testing in Bangladesh. *Malar J*. 2021; 20(1):217. <https://doi.org/10.1186/s12936-021-03743-w> PMID: 33980257
